# Supplementary material for: Different prognostic impact of STK11 mutations in non-squamous non-small-cell lung cancer
Source: PubMed Central journal article supplement (PMC5410347; doi:10.18632/oncotarget.6379), 2015-11-25
Supplement: oncotarget-08-23831-s001.pdf [file oncotarget-08-23831-s001.pdf]

# Different prognostic impact of *STK11* mutations in non-squamous non-small-cell lung cancer

## Supplementary Material

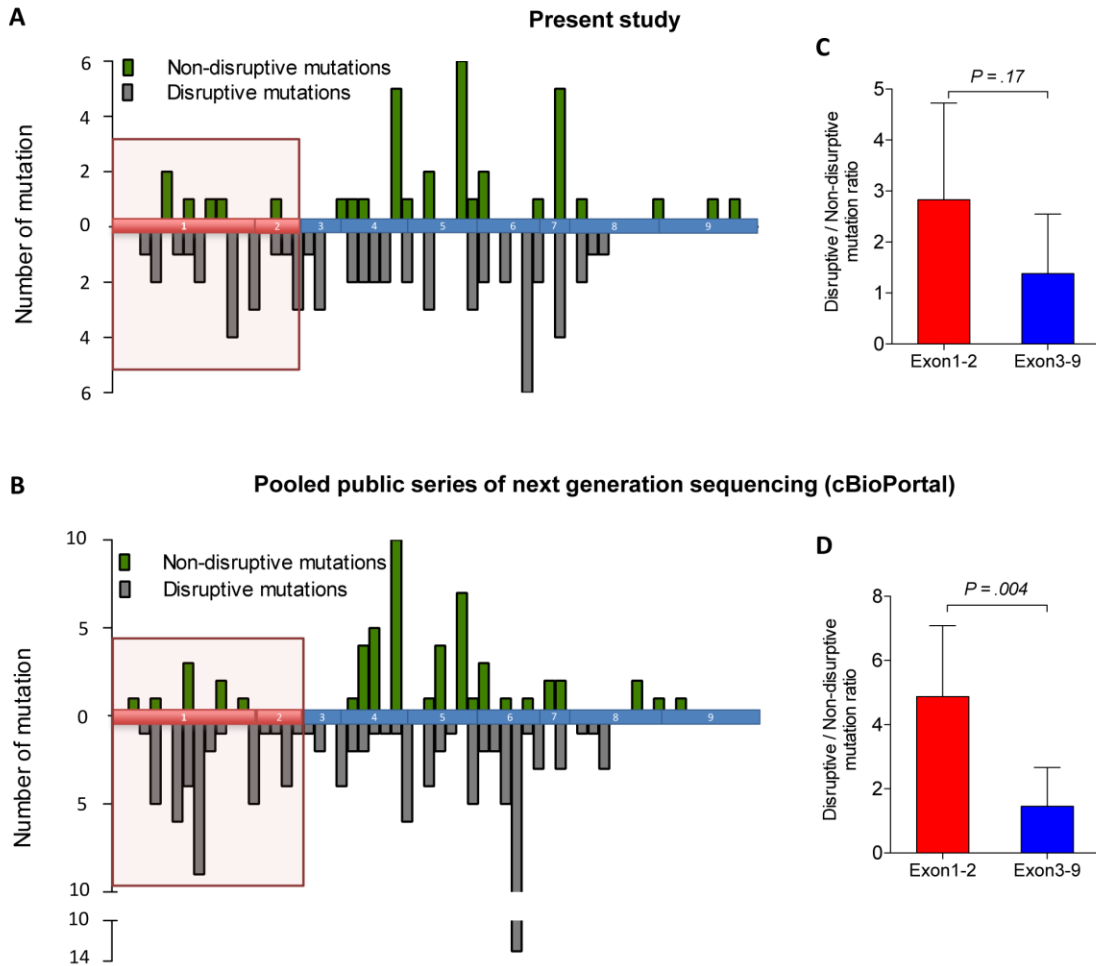

**e-Figure 1.** A and B. *STK11* mutations distribution along gene locus: Disruptive mutations (nonsense, frameshift indel, splice; grey box) vs. Non-Disruptive mutations (missense, inframe indel; green box). Each histogram reports the sum of *STK11* mutations within 22bp intervals. C and D. Disruptive mutation / non-disruptive mutation ratio in both series. Ratio is calculated for exons 1-2 and exons 3-9. Standard errors and  $\chi^2$  P-Values are indicated.

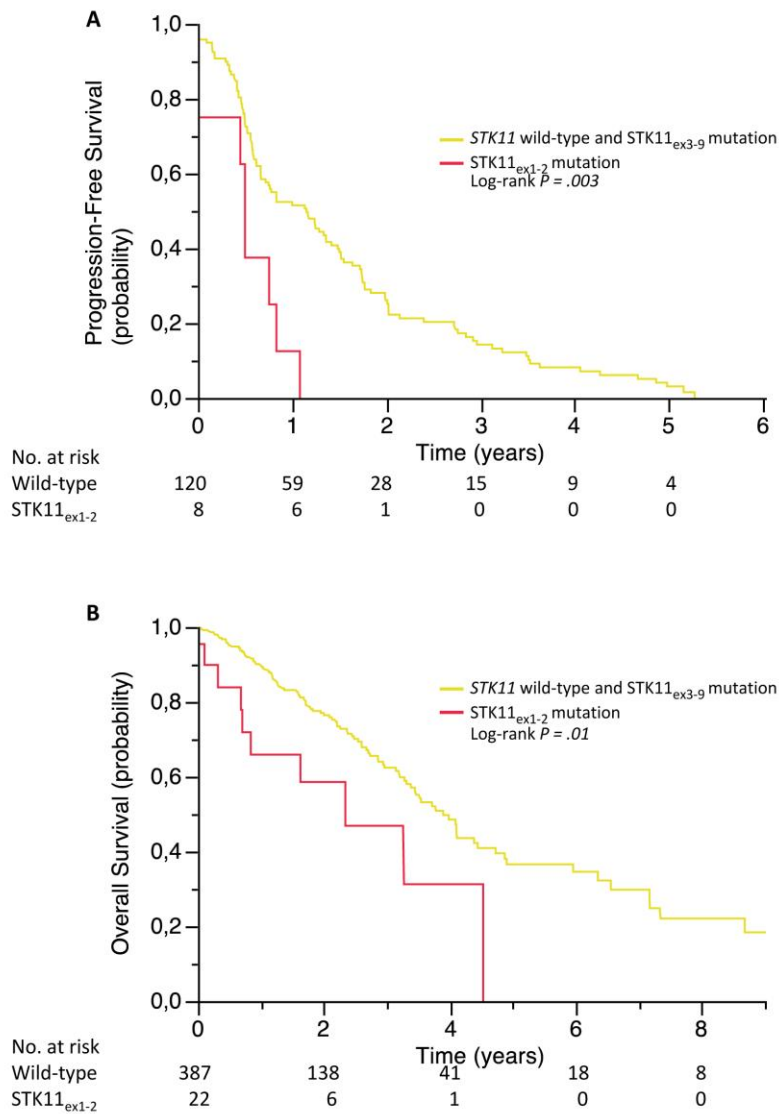

**e-Figure 2.** Progression-free survival and Overall survival according to *STK11* mutation status in validation series: patients harboring *STK11*<sub>ex1-2</sub> mutations were compared to the others. A. Progression-free survival (N=128; Imielinski series). Patients with *STK11*<sub>ex1-2</sub> mutations had a median progression-free survival of 0.5 years (95%CI, 0 to 0.8) as compared to 1.2 years (95%CI, 0.7-1.4) for the others. B. Overall survival in the TCGA lung adenocarcinomas series (N=409). Patients with *STK11*<sub>ex1-2</sub> mutations had a median overall survival of 2.3 years (95%CI, 0.7-4.5) compared to 3.90 years (95%CI, 3.4-4.4) for wild-type patients.

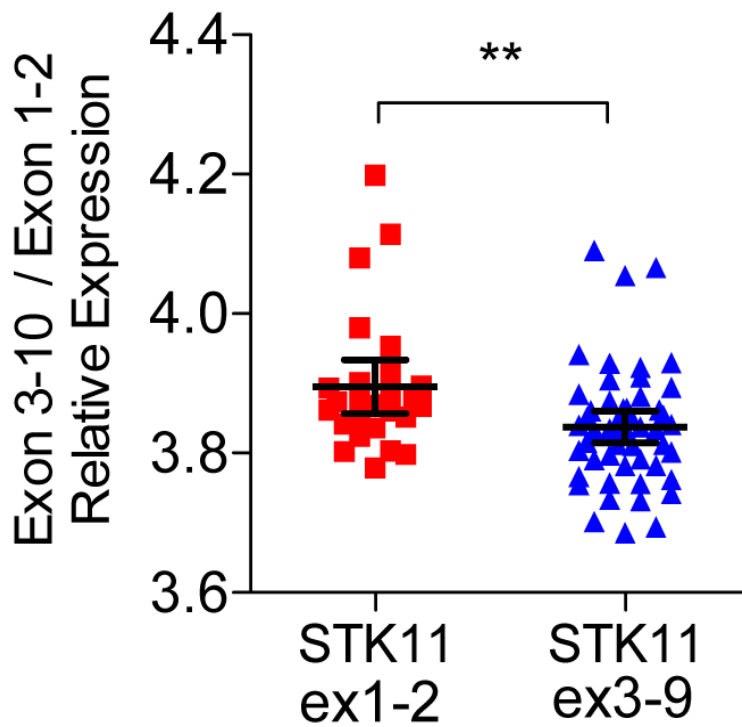

**e-Figure 3.** Expression of *STK11* exons 3 to 10 according to *STK11* mutation status. The exon expression dataset from TCGA mRNAseq was used. The relative expression ratio of exon 3 to 10 / exon 1 and 2 was computed as the sum of reads mapping to exon 3 to exon 10 divided by the sum of reads mapping to exon 1 and exon 2. The expression ratios were compared between *STK11* mutation groups using Mann-Whitney test. P-Values are indicated by **\*\* $P < .005$** .

**e-Table 1.** Annotated mutations found in our series.

**e-Table 2.** Patient and tumor characteristics in subgroups defined by *STK11* mutation status (training series, n = 490).

| Characteristic     | <i>STK11</i> <sub>ex1-2</sub><br>mutation<br>(n = 23) |      | <i>STK11</i> <sub>ex3-9</sub><br>mutation<br>(n = 69) |      | <i>STK11</i><br>wild-type<br>(n = 398) |      | <i>P</i>     |
|--------------------|-------------------------------------------------------|------|-------------------------------------------------------|------|----------------------------------------|------|--------------|
|                    | N                                                     | %    | N                                                     | %    | N                                      | %    |              |
| Gender             |                                                       |      |                                                       |      |                                        |      |              |
| Male               | 15                                                    | 65   | 45                                                    | 65   | 267                                    | 67   | <i>.94</i>   |
| Female             | 8                                                     | 35   | 24                                                    | 35   | 131                                    | 32   |              |
| Age                |                                                       |      |                                                       |      |                                        |      |              |
| Mean ± SD          | 60                                                    | ±2.3 | 58                                                    | ±1.3 | 62                                     | ±0.6 | <i>.04</i>   |
| Smoking history    |                                                       |      |                                                       |      |                                        |      |              |
| Present or former  | 21                                                    | 91   | 67                                                    | 97   | 308                                    | 20   | <i>.002</i>  |
| Never              | 2                                                     | 9    | 2                                                     | 3    | 78                                     | 77   |              |
| NA                 | 0                                                     | 0    | 0                                                     | 0    | 12                                     | 3    |              |
| Surgery            |                                                       |      |                                                       |      |                                        |      |              |
| Lobectomy          | 20                                                    | 87   | 62                                                    | 90   | 345                                    | 87   | <i>.57</i>   |
| Pneumonectomy      | 2                                                     | 9    | 6                                                     | 9    | 28                                     | 7    |              |
| Non anatomic       | 1                                                     | 5    | 1                                                     | 2    | 25                                     | 6    |              |
| Tumor stage        |                                                       |      |                                                       |      |                                        |      |              |
| I                  | 12                                                    | 52   | 37                                                    | 54   | 189                                    | 47   | <i>.88</i>   |
| II                 | 6                                                     | 26   | 13                                                    | 19   | 99                                     | 25   |              |
| III                | 4                                                     | 17   | 17                                                    | 25   | 90                                     | 23   |              |
| IV                 | 1                                                     | 4    | 2                                                     | 3    | 20                                     | 5    |              |
| Histological types |                                                       |      |                                                       |      |                                        |      |              |
| Adenocarcinomas    | 23                                                    | 100  | 67                                                    | 97   | 370                                    | 93   | <i>.18</i>   |
| Other non-squamous | 0                                                     | 0    | 2                                                     | 3    | 28                                     | 7    |              |
| Mutations          |                                                       |      |                                                       |      |                                        |      |              |
| <i>TP53</i>        | 13                                                    | 57   | 34                                                    | 49   | 200                                    | 50   | <i>.83</i>   |
| <i>KRAS</i>        | 12                                                    | 52   | 31                                                    | 45   | 122                                    | 31   | <i>.01</i>   |
| <i>EGFR</i>        | 0                                                     | 0    | 1                                                     | 2    | 65                                     | 16   | <i>.0006</i> |

NA, not available; GOF, gain of oncogenic function; TSF, tumor suppressive function; NSCLC, non-small-cell lung cancer. Proportions are compared using Chi-2. Means are compared using ANOVA.

**e-Table 3.** Patient characteristics of validation series (Imielinski and TCGA).

| Characteristic               | Imielinski series<br>(N=128) |    | TCGA series<br>(N=409) |     |
|------------------------------|------------------------------|----|------------------------|-----|
|                              | No.                          | %  | No.                    | %   |
|                              | Gender                       |    |                        |     |
| Male                         | <i>62</i>                    | 48 | <i>187</i>             | 46  |
| Female                       | <i>66</i>                    | 52 | <i>222</i>             | 54  |
| Age                          |                              |    |                        |     |
| < 70 years                   | <i>77</i>                    | 60 | <i>270</i>             | 66  |
| ≥ 70 years                   | <i>51</i>                    | 40 | <i>139</i>             | 34  |
| Tumor Stage                  |                              |    |                        |     |
| I                            | <i>73</i>                    | 57 | <i>218</i>             | 53  |
| II                           | <i>30</i>                    | 23 | <i>96</i>              | 24  |
| III                          | <i>17</i>                    | 13 | <i>74</i>              | 18  |
| IV                           | <i>8</i>                     | 6  | <i>21</i>              | 5   |
| Histological type            |                              |    |                        |     |
| Adenocarcinomas              | <i>117</i>                   | 91 | <i>406</i>             | 100 |
| Others                       | <i>11</i>                    | 9  | <i>0</i>               | 0   |
| Mutations                    |                              |    |                        |     |
| <i>TP53</i>                  | <i>60</i>                    | 47 | <i>224</i>             | 55  |
| <i>KRAS</i>                  | <i>35</i>                    | 27 | <i>119</i>             | 29  |
| <i>EGFR</i>                  | <i>19</i>                    | 15 | <i>56</i>              | 14  |
| <i>STK11</i>                 | <i>21</i>                    | 16 | <i>65</i>              | 16  |
| <i>STK11<sub>ex1-2</sub></i> | <i>8</i>                     | 6  | <i>22</i>              | 5   |
| <i>STK11<sub>ex3-9</sub></i> | <i>13</i>                    | 10 | <i>43</i>              | 11  |

p<0.05 are in bold ; NA not available
